# Supplementary material for: Rationally assembled rGO/Sn/Na2Zr(PO4)2 nanocomposites as high performance anode materials for lithium and sodium ion batteries
Source: Royal Society of Chemistry journal article supplement (doi:10.1039/c9se00158a), 2019-01-01
Supplement: c9se00158a1.pdf [file c9se00158a1.pdf]

Electronic Supplementary Information (ESI) for

**Rationally Assembled rGO/Sn/Na<sub>2</sub>Zr(PO<sub>4</sub>)<sub>2</sub> Nanocomposites as High Performance Anode Materials for Lithium and Sodium Ion Batteries**

Mei Ma,<sup>a,b</sup> Wenzhou Shen,<sup>b</sup> Jiali Zhang<sup>b</sup> and Shouwu Guo<sup>\*b</sup>

<sup>a</sup>School of Materials Science and Engineering, Shanghai Jiao Tong University,  
Shanghai 200240, P.R. China

<sup>b</sup>Department of Electronic Engineering, School of Electronic Information and  
Electrical Engineering, Shanghai Jiao Tong University, Shanghai 200240, P.R. China

Correspondence should be addressed to: swguo@sjtu.edu.cn

**Table S1** The ICP data of Sn contents in Sn/Na<sub>2</sub>Zr(PO<sub>4</sub>)<sub>2</sub> composites.

| Composites                                              | SnCl <sub>2</sub> ·2H <sub>2</sub> O/mmol | NaBH <sub>4</sub> /mmol | (ICP) Sn/% |
|---------------------------------------------------------|-------------------------------------------|-------------------------|------------|
| Sn/Na <sub>2</sub> Zr(PO <sub>4</sub> ) <sub>2</sub> -a | 1                                         | 5                       | 21.35      |
| Sn/Na <sub>2</sub> Zr(PO <sub>4</sub> ) <sub>2</sub> -b | 0.5                                       | 2.5                     | 10.45      |
| Sn/Na <sub>2</sub> Zr(PO <sub>4</sub> ) <sub>2</sub> -c | 1.5                                       | 7.5                     | 29.39      |

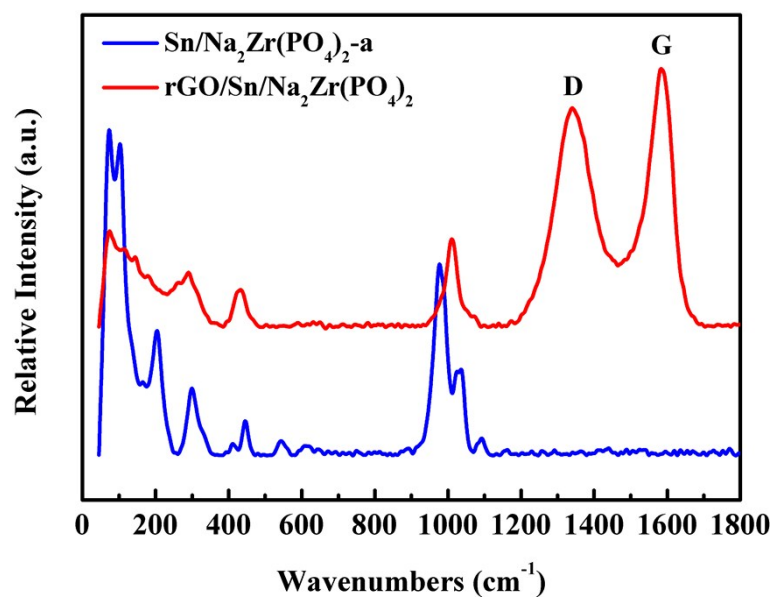

**Fig. S1** Raman spectra of  $\text{Sn/Na}_2\text{Zr(PO}_4)_2\text{-a}$ , and  $\text{rGO/Sn/Na}_2\text{Zr(PO}_4)_2$  composites. The mass fraction of rGO in the  $\text{rGO/Sn/Na}_2\text{Zr(PO}_4)_2$  is 4.5%.

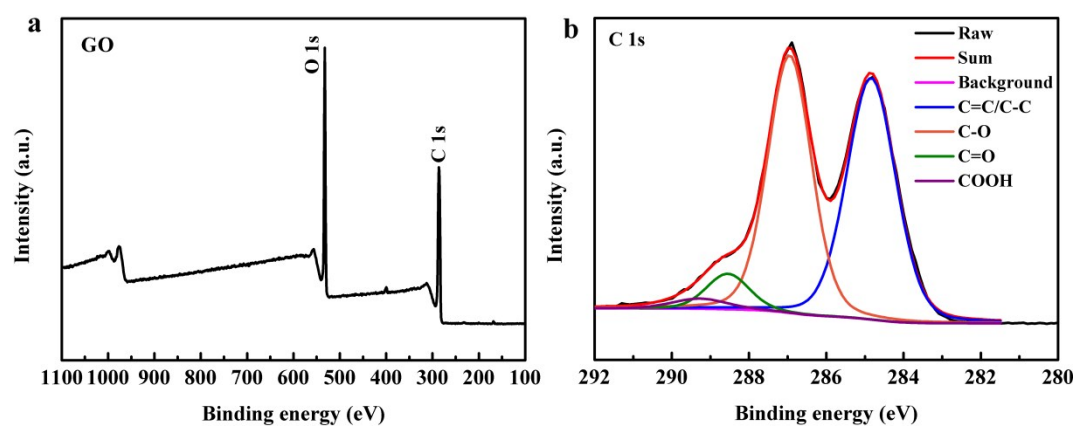

**Fig. S2** XPS spectra of GO: (a) survey, (b) C 1s spectrum.

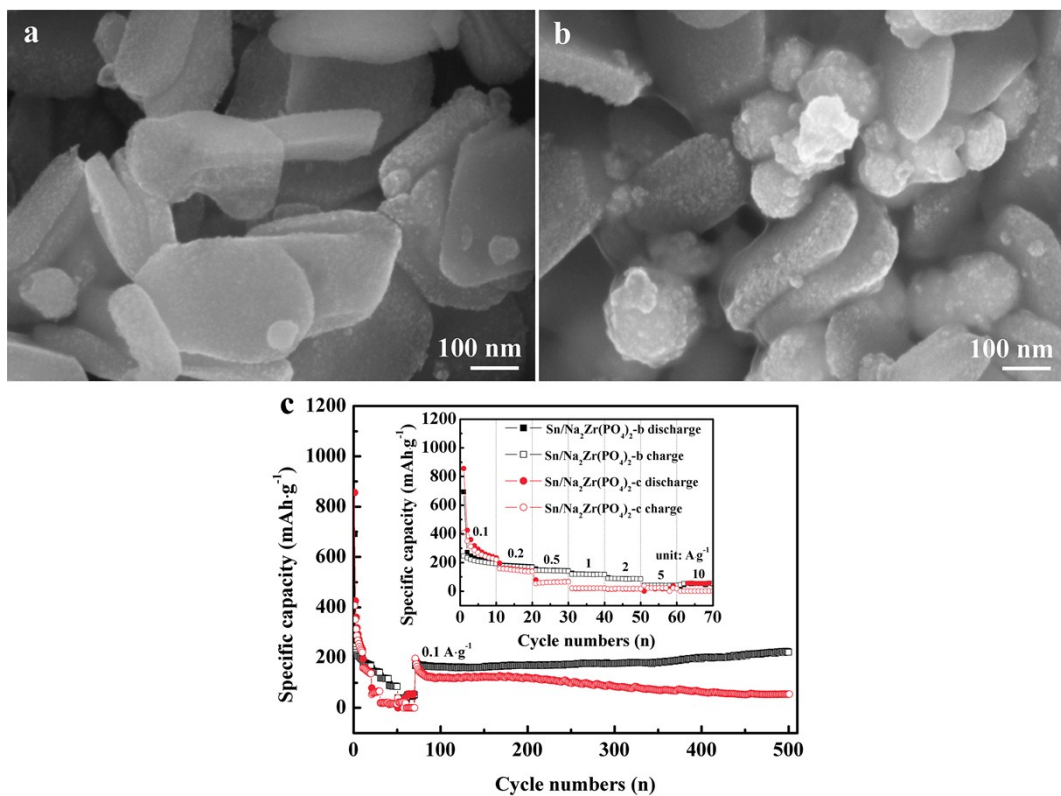

**Fig. S3** SEM images of Sn/Na<sub>2</sub>Zr(PO<sub>4</sub>)<sub>2</sub> composites (a) Sn/Na<sub>2</sub>Zr(PO<sub>4</sub>)<sub>2</sub>-b, and (b) Sn/Na<sub>2</sub>Zr(PO<sub>4</sub>)<sub>2</sub>-c; (c) Galvanostatic charge/discharge curves of Sn/Na<sub>2</sub>Zr(PO<sub>4</sub>)<sub>2</sub>-b and Sn/Na<sub>2</sub>Zr(PO<sub>4</sub>)<sub>2</sub>-c as anodes for LIBs, measured at current densities from 0.1 A g<sup>-1</sup> to 10 A g<sup>-1</sup>.

**Table S2** The electric resistivity of Sn/Na<sub>2</sub>Zr(PO<sub>4</sub>)<sub>2</sub>-a, and rGO/Sn/Na<sub>2</sub>Zr(PO<sub>4</sub>)<sub>2</sub> composites.

| Samples (bare and dry powder)                            | Electric Resistivity/ $\Omega$ mm |
|----------------------------------------------------------|-----------------------------------|
| Sn/Na <sub>2</sub> Zr(PO <sub>4</sub> ) <sub>2</sub> -a  | $1.41 \times 10^7$                |
| rGO/Sn/Na <sub>2</sub> Zr(PO <sub>4</sub> ) <sub>2</sub> | 840                               |

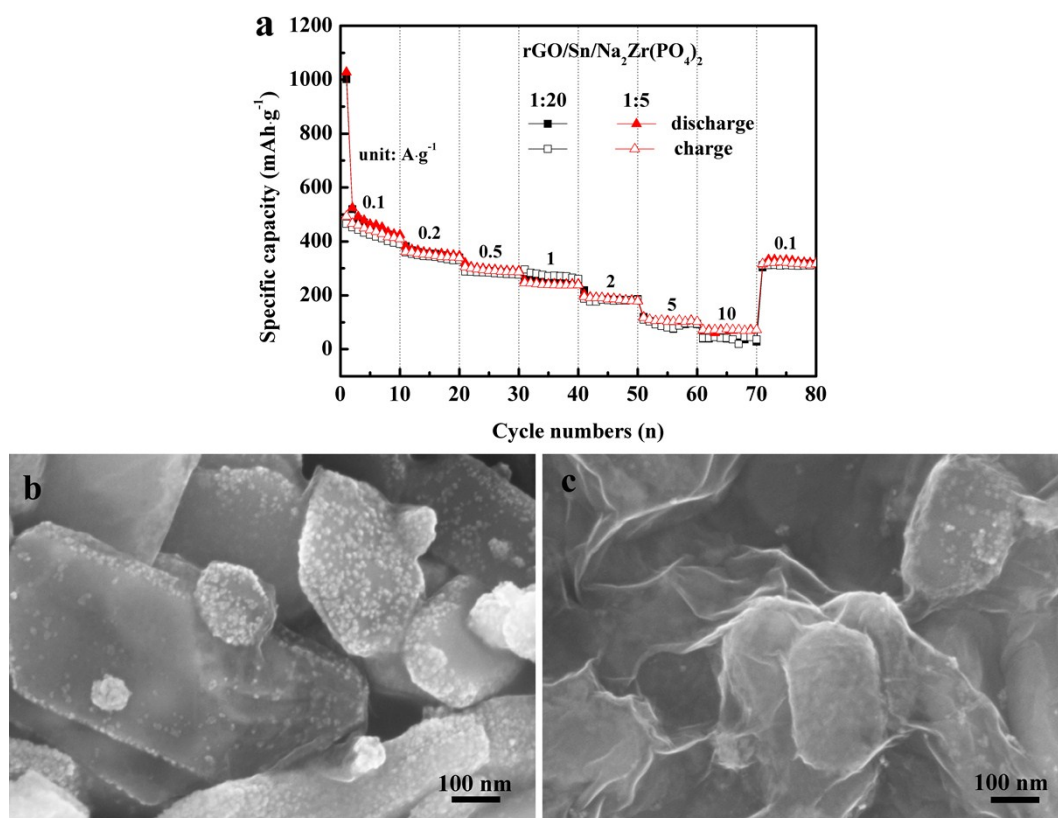

**Fig. S4** (a) Galvanostatic charge/discharge curves of  $\text{rGO/Sn/Na}_2\text{Zr(PO}_4)_2$  composites with different GO to  $\text{Sn/[Na}_2\text{Zr(PO}_4)_2 \cdot \text{H}_2\text{O]}$  ratios in weight, measured at current densities from  $0.1 \text{ A g}^{-1}$  to  $10 \text{ A g}^{-1}$ ; SEM images of (b)  $\text{rGO/Sn/Na}_2\text{Zr(PO}_4)_2$  (1:20), and (c)  $\text{rGO/Sn/Na}_2\text{Zr(PO}_4)_2$  (1:5) composite.

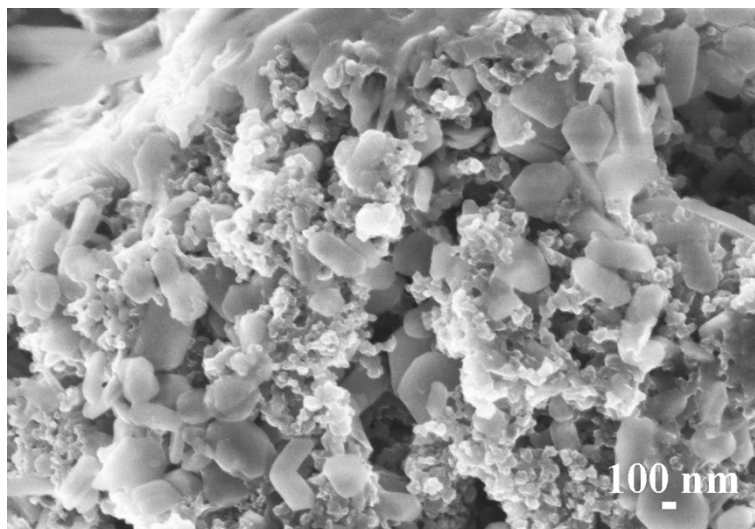

**Fig. S5** SEM image of rGO/Sn/Na<sub>2</sub>Zr(PO<sub>4</sub>)<sub>2</sub> anode after 200 cycles at 0.1 A g<sup>-1</sup>. (Note: After 200 charge/discharge cycles, coin half-cell with rGO/Sn/Na<sub>2</sub>Zr(PO<sub>4</sub>)<sub>2</sub> as anode was opened in an argon-filled glove box, and dimethyl carbonate (DMC) was used to wash away the residual LiPF<sub>6</sub> on the electrode surface. Afterwards, SEM was employed to analyze the morphology of the electrode material.)



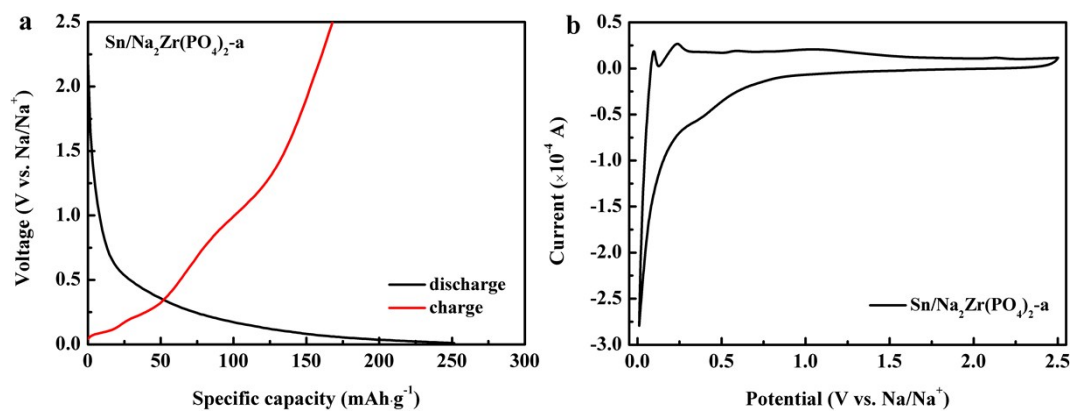

**Fig. S6** (a) Charge/discharge voltage profiles of  $\text{Sn}/\text{Na}_2\text{Zr}(\text{PO}_4)_2\text{-a}$  at the second charge/discharge cycle measured at a current density of  $0.1 \text{ A g}^{-1}$ , and (b) the corresponding CV measured at a scanning rate of  $0.5 \text{ mV s}^{-1}$ .

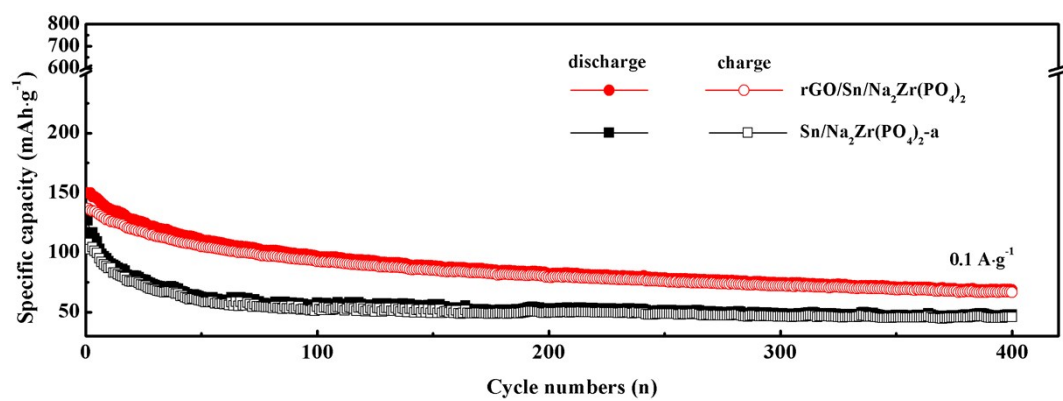

**Fig. S7** Cycling performances of  $\text{Sn/Na}_2\text{Zr(PO}_4)_2\text{-a}$  and  $\text{rGO/Sn/Na}_2\text{Zr(PO}_4)_2$  anodes, measured at a current density of  $0.1\text{ A}\cdot\text{g}^{-1}$ .

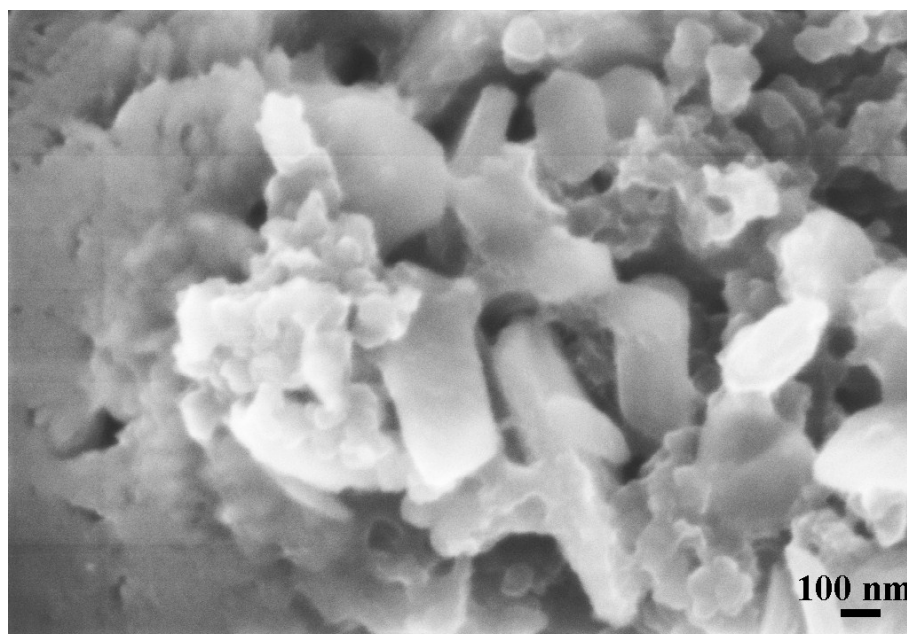

**Fig. S8** SEM image of rGO/Sn/Na<sub>2</sub>Zr(PO<sub>4</sub>)<sub>2</sub> anode for SIB after 400 charge/discharge cycles at 0.1 A g<sup>-1</sup>. (Note: After 400 charge/discharge cycles, coin half-cell with rGO/Sn/Na<sub>2</sub>Zr(PO<sub>4</sub>)<sub>2</sub> as anode for SIB was opened in an argon-filled glove box, and dimethyl carbonate (DMC) was used to wash away the residual NaClO<sub>4</sub> on the electrode surface. Afterwards, SEM was employed to analyze the morphology of the electrode material.)
